# Supplementary material for: Effect of Layer Thickness in Layered Aluminum Matrix Syntactic Foam
Source: Materials (Basel). 2019 Dec 12;12(24):4172. doi: 10.3390/ma12244172 (PMC6947444; doi:10.3390/ma12244172)
Supplement: Supplementary file 1 [file materials-12-04172-s001.pdf]

Article

# Supplementary Materials: The influence of disc surface topography after vapour blasting on friction and wear of sliding pairs under dry sliding conditions

Chenhao Qian <sup>1,2,\*</sup>, Chen Liang <sup>3,#</sup>, Ziyang He <sup>4</sup> and Weixi Ji <sup>1,2,\*</sup>

<sup>1</sup> School of Mechanical Engineering, Jiangnan University, Wuxi 214122, China

<sup>2</sup> Jiangsu Key Laboratory of Advanced Food Manufacturing Equipment and Technology, Jiangnan University, Wuxi 214122, China

<sup>3</sup> School of Engineering, University of Liverpool, Liverpool L69 3GH, United Kingdom; Chen.Liang@liverpool.ac.uk

<sup>4</sup> Department of Computer Science, Columbia University, New York, 10027, United States; zh2330@columbia.edu

\* Correspondence: qianch@jiangnan.edu.cn (C.Q.); jiweixi@jiangnan.edu.cn (W.J.)

# These authors contribute equally.

Received: 17 November 2019; Accepted: 11 December 2019; Published: date

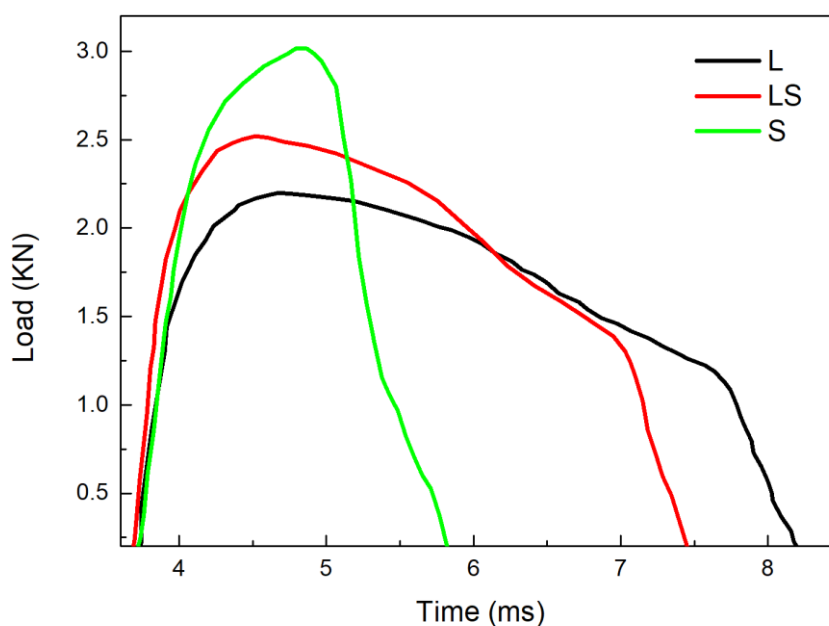

**Figure 1.** Charpy impact test curves of impact load-time of the samples.

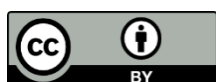

© 2019 by the authors. Submitted for possible open access publication under the terms and conditions of the Creative Commons Attribution (CC BY) license (<http://creativecommons.org/licenses/by/4.0/>).
